# Supplementary material for: Sex differences in functional limitations and the role of socioeconomic factors: a multi-cohort analysis
Source: PubMed Central journal article supplement (PMC8636280; doi:10.1016/s2666-7568(21)00249-x), 2021-12
Supplement: mmc1.pdf [file mmc1.pdf]

# THE LANCET

## Healthy Longevity

### Supplementary appendix

This appendix formed part of the original submission and has been peer reviewed.  
We post it as supplied by the authors.

Supplement to: Bloomberg M, Dugravot A, Landré B, et al. Sex differences in functional limitations and the role of socioeconomic factors: a multi-cohort analysis. *Lancet Healthy Longev* 2021; published online Nov 25. [https://doi.org/10.1016/S2666-7568\(21\)00249-X](https://doi.org/10.1016/S2666-7568(21)00249-X).

## **Supplementary materials**

*Sex differences in functional limitations and the role of socioeconomic factors: a multi-cohort analysis*

Mikaela Bloomberg, MSc<sup>1</sup>

Aline Dugravot, MSc<sup>2</sup>

Dr Benjamin Landré, PhD<sup>2</sup>

Professor Annie Britton, PhD<sup>1</sup>

Professor Andrew Steptoe, FMedSci<sup>3</sup>

Professor Archana Singh-Manoux, PhD<sup>1,2</sup>

Dr Séverine Sabia, PhD<sup>1,2</sup>

<sup>1</sup>Department of Epidemiology and Public Health, University College London, UK

<sup>2</sup>Université de Paris, Inserm U1153, Epidemiology of Ageing and Neurodegenerative diseases, France

<sup>3</sup>Department of Behavioural Science and Health, University College London, UK

## **Figures**

|                                                                                                                |    |
|----------------------------------------------------------------------------------------------------------------|----|
| Figure S1. Flowchart of sample selection in ELSA.....                                                          | 3  |
| Figure S2. Flowchart of sample selection in TILDA.....                                                         | 4  |
| Figure S3. Flowchart of sample selection in SHARE.....                                                         | 5  |
| Figure S4. Flowchart of sample selection in HRS.....                                                           | 6  |
| Figure S5. Observed proportion $\geq 1$ mobility, IADL, and ADL limitation in ELSA, TILDA, SHARE, and HRS..... | 7  |
| Figure S6. Sex differences in probability of $\geq 1$ mobility limitation by region.....                       | 9  |
| Figure S7. Sex differences in probability of $\geq 1$ IADL limitation by region.....                           | 10 |
| Figure S8. Sex differences in probability of $\geq 1$ ADL limitation by region.....                            | 11 |

## **Tables**

|                                                                                                                                      |    |
|--------------------------------------------------------------------------------------------------------------------------------------|----|
| Table S1. Countries in each included study.....                                                                                      | 13 |
| Table S2. Waves and years included in analyses from ELSA, TILDA, SHARE, and HRS.....                                                 | 14 |
| Table S3. Activities assessed for each functional measure.....                                                                       | 15 |
| Table S4. Baseline distribution of self-reported chronic conditions in the pooled study population.....                              | 16 |
| Table S5. Sex differences in probability of mobility limitations by severity of limitations.....                                     | 17 |
| Table S6. Sex differences in probability of instrumental activity of daily living (IADL) limitations by severity of limitations..... | 18 |
| Table S7. Sex differences in probability of activity of daily living (ADL) limitations by severity of limitations.....               | 19 |

**Figure S1. Flowchart of sample selection in ELSA.**

ELSA (2002-2019)  
 Follow-up mean duration = 9.1y, median = 10y, range: 0 to 17y

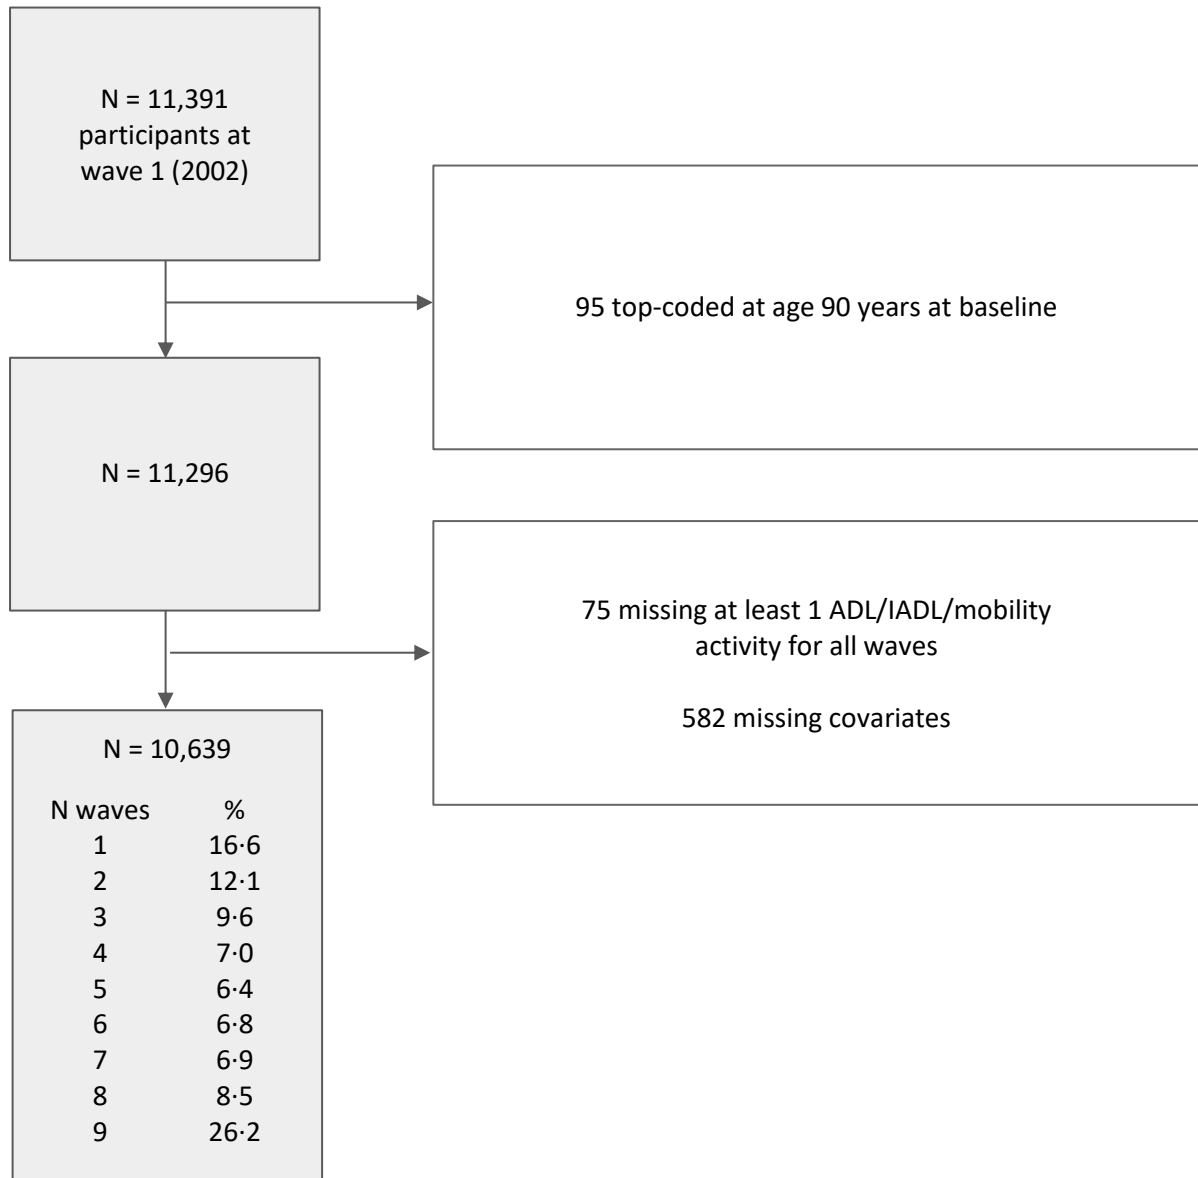

Figure S2. Flowchart of sample selection in TILDA.

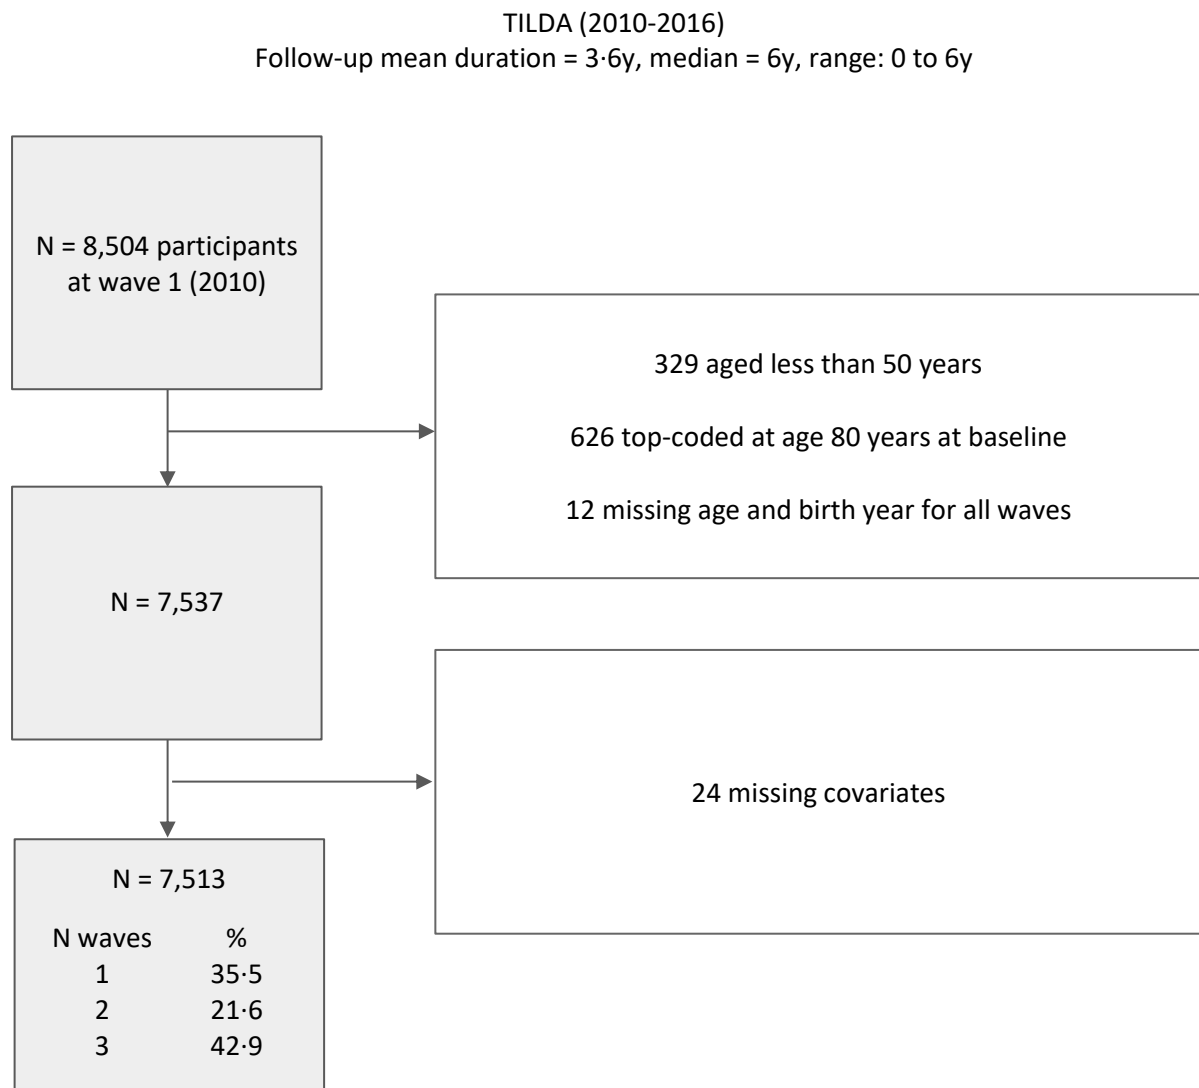

Figure S3. Flowchart of sample selection in SHARE.

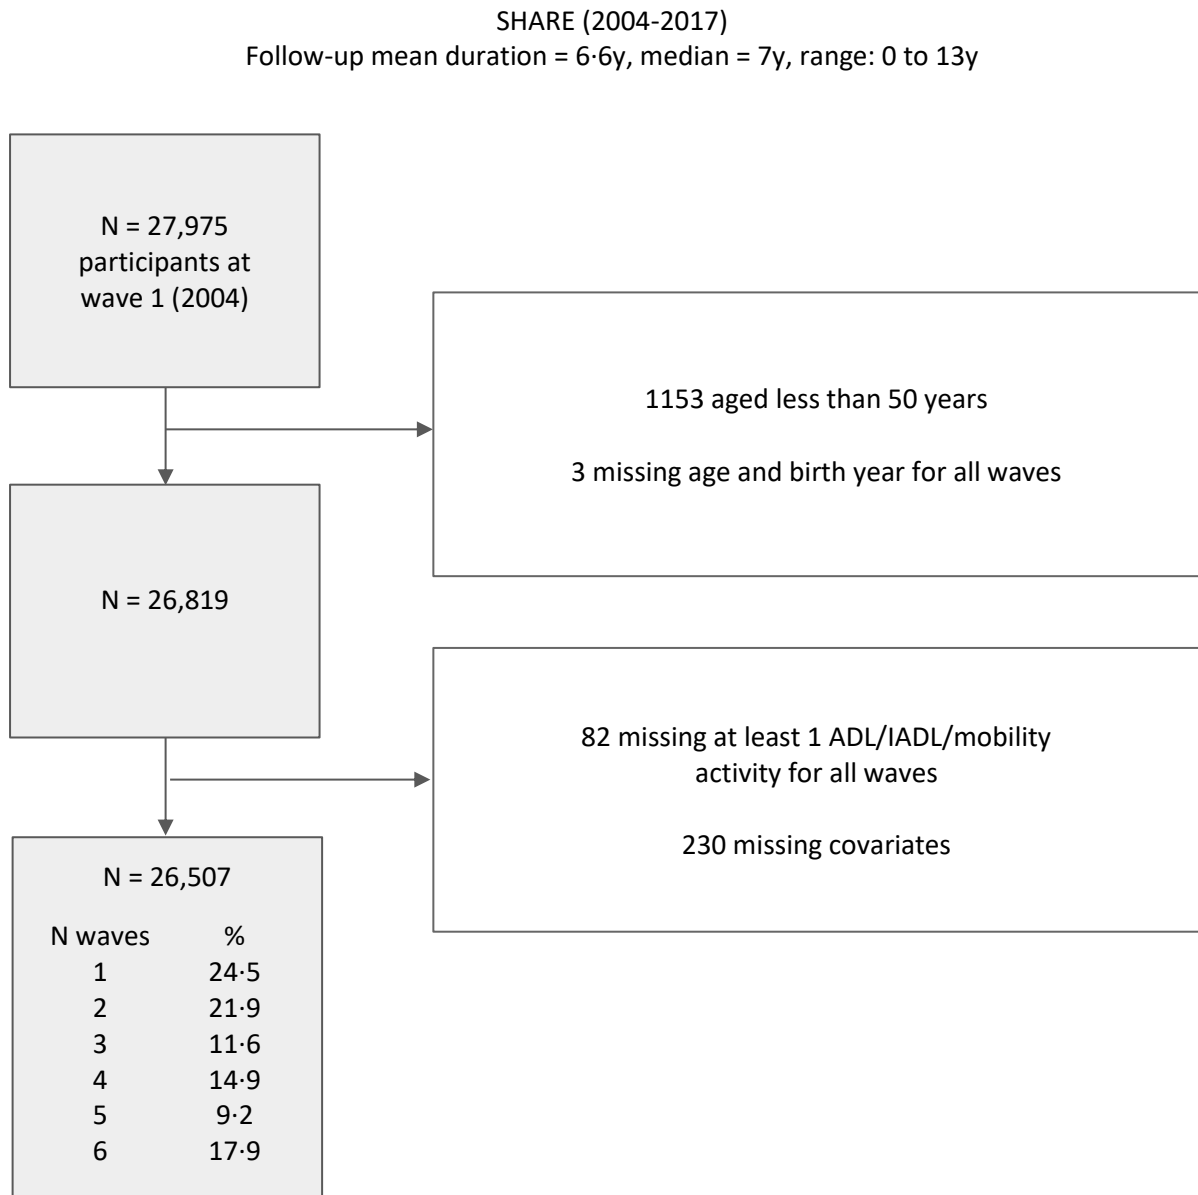

Figure S4. Flowchart of sample selection in HRS.

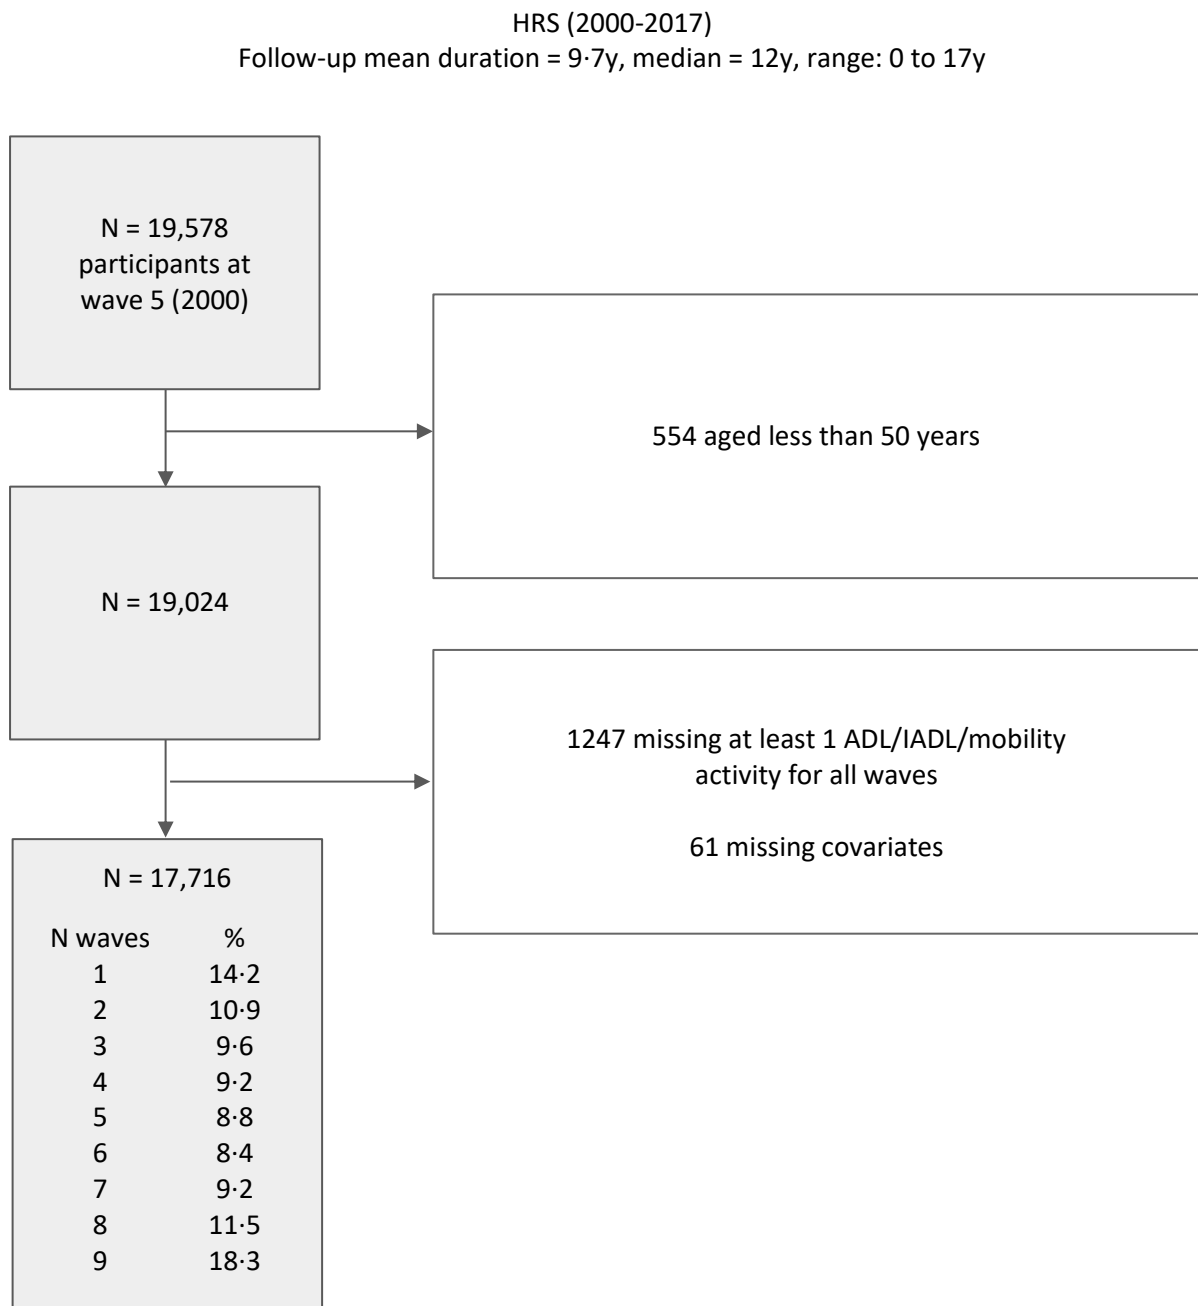

Figure S5. Observed proportion  $\geq 1$  mobility, IADL, and ADL limitation in ELSA, TILDA, SHARE, and HRS.



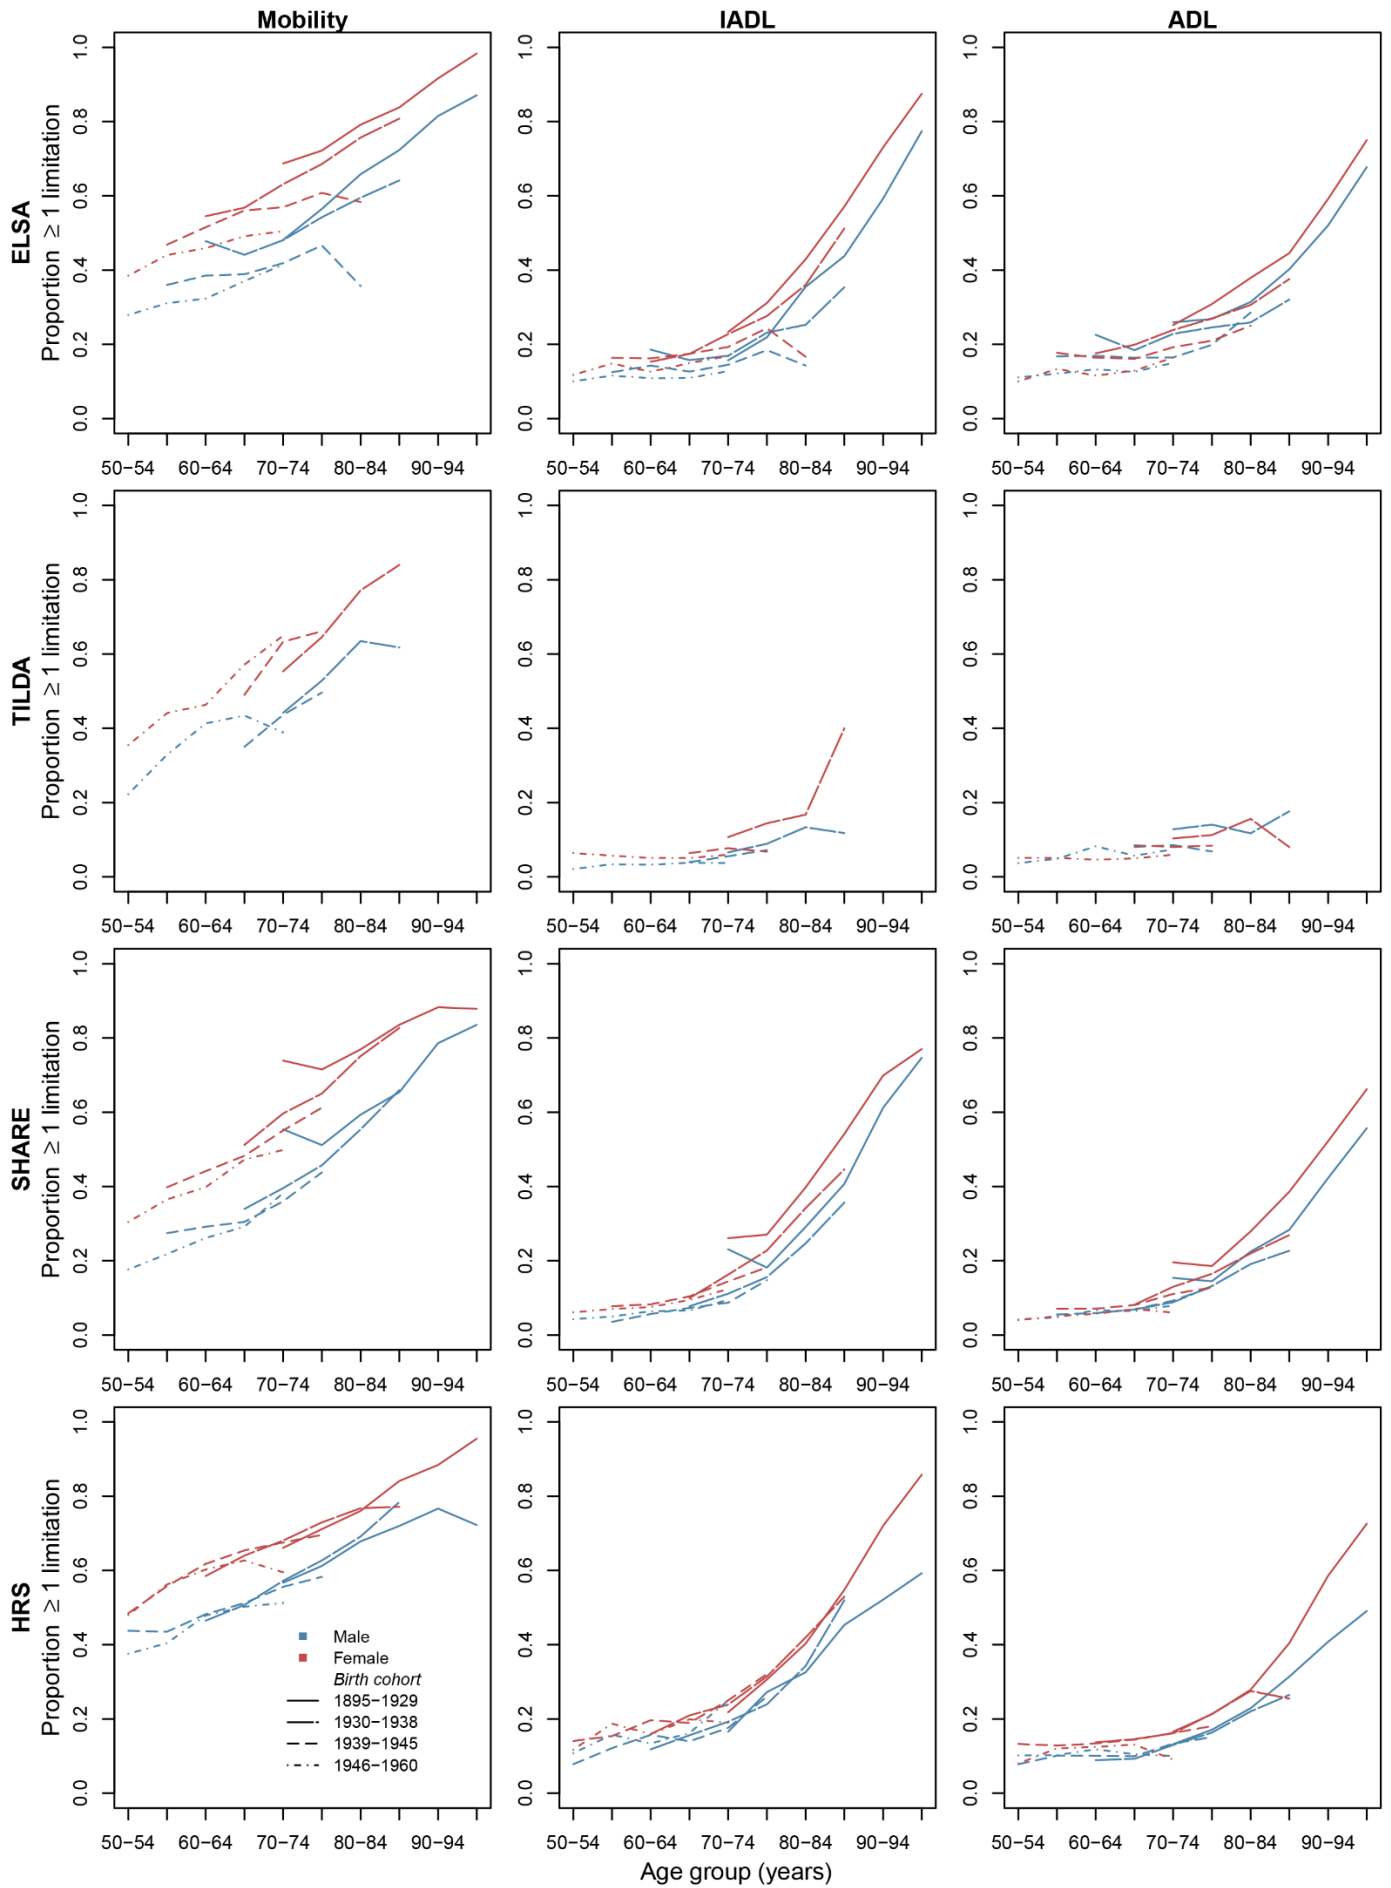

**Figure S6. Sex differences in probability of  $\geq 1$  mobility limitation by region.**

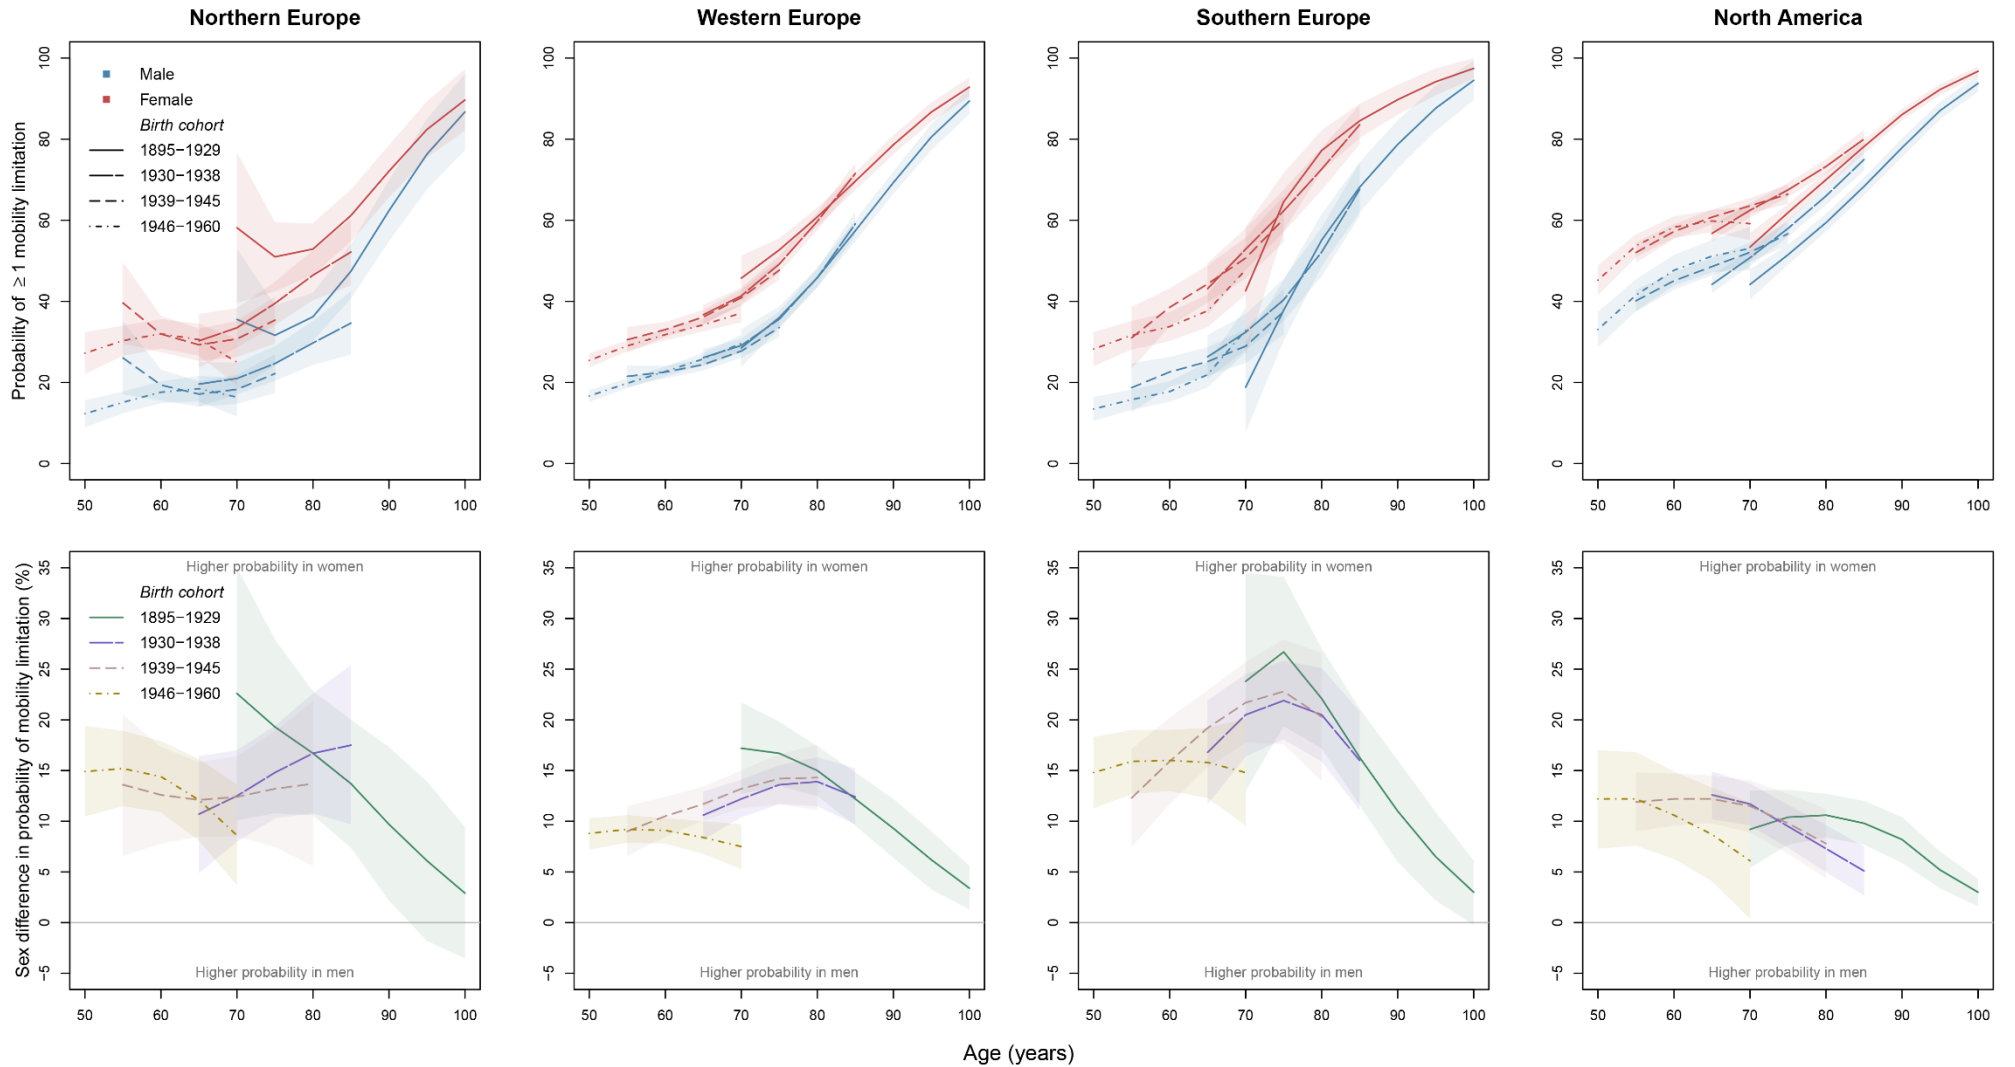

Top panel shows the probability of having  $\geq 1$  mobility limitation plotted by age for men and women in each birth cohort. Bottom panel shows the sex difference in probability of  $\geq 1$  mobility limitation: positive value indicates women have greater probability than men of  $\geq 1$  mobility limitation. Predicted probabilities based on models in each region adjusted for sex, age, birth cohort, and their interactions, marital status, education and labour force status, and plotted for reference categories for all covariates.

**Figure S7. Sex differences in probability of  $\geq 1$  IADL limitation by region.**

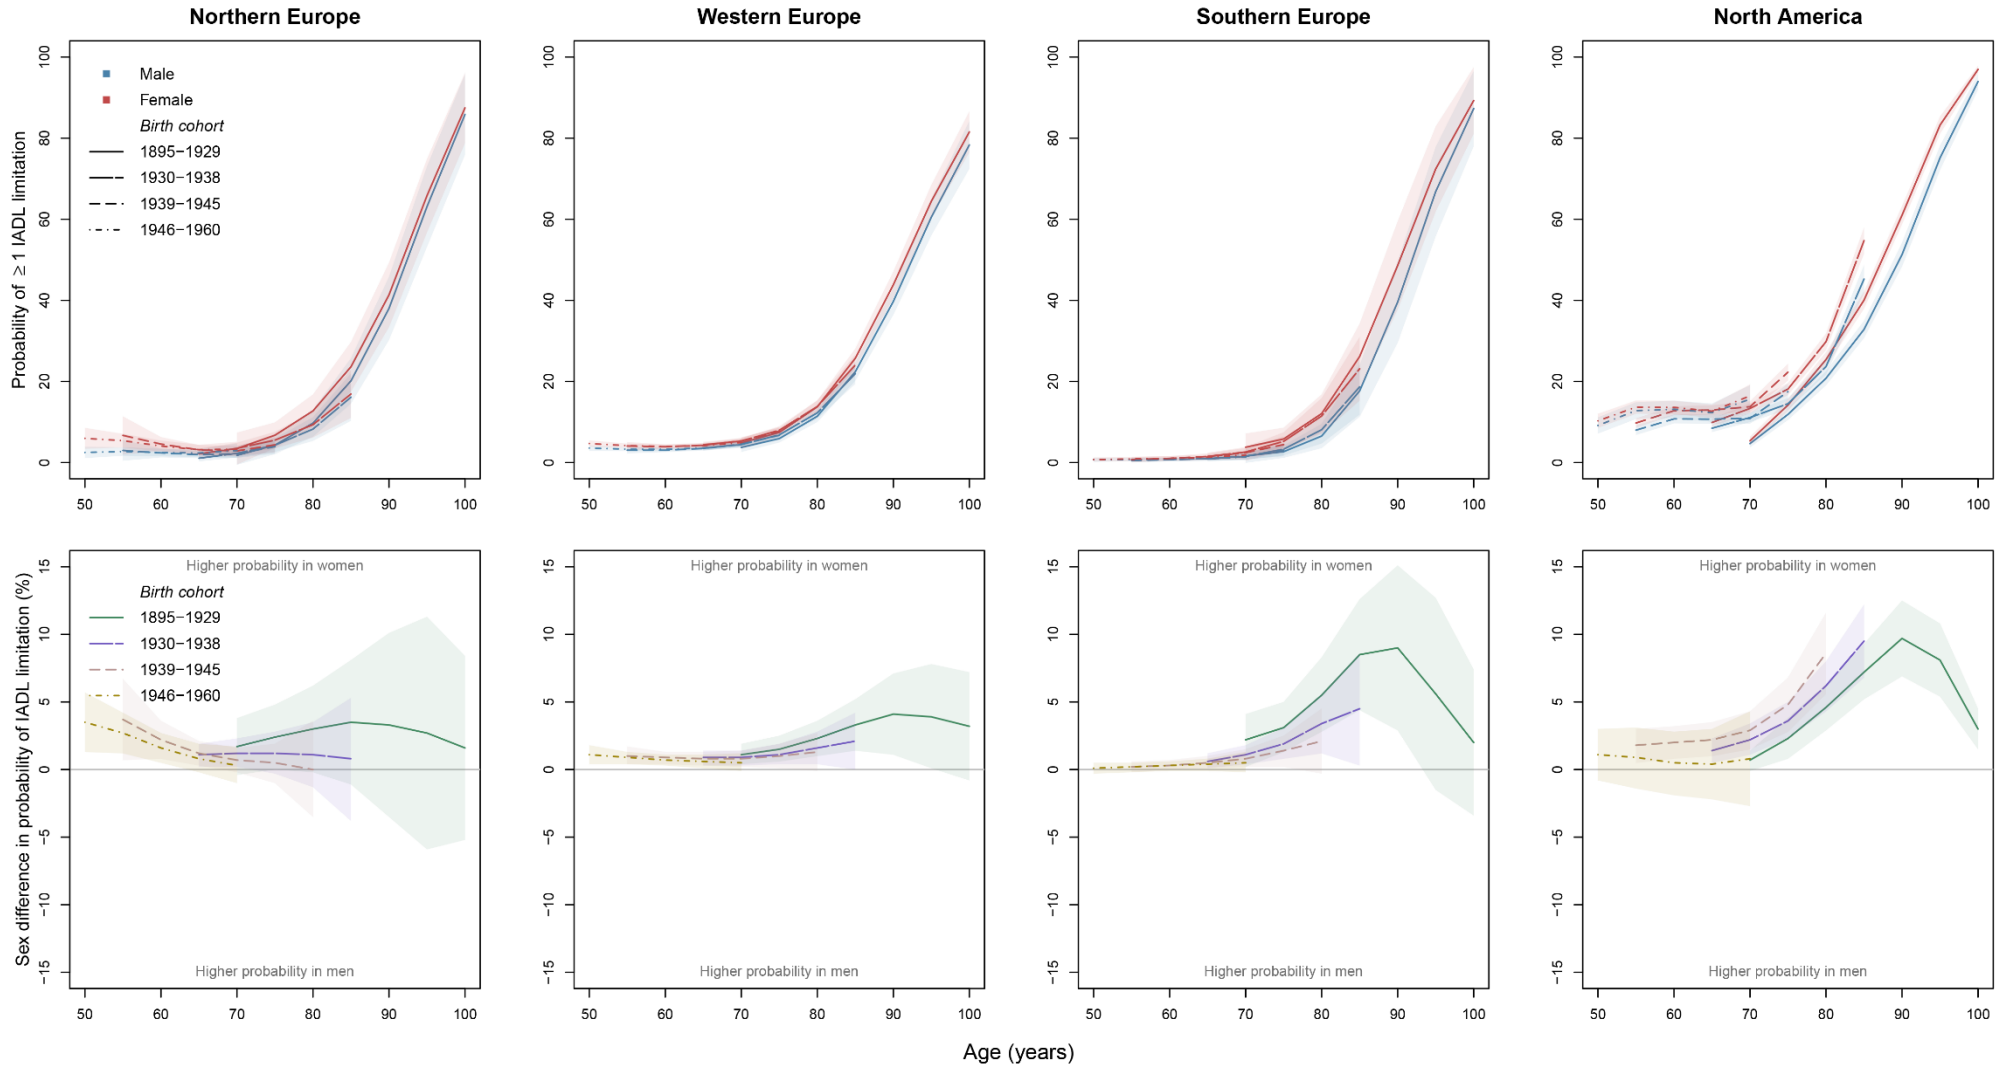

Top panel shows the probability of having  $\geq 1$  IADL limitation plotted by age for men and women in each birth cohort. Bottom panel shows the sex difference in probability of  $\geq 1$  IADL limitation: positive value indicates women have greater probability than men of  $\geq 1$  IADL limitation. Predicted probabilities based on models in each region adjusted for sex, age, birth cohort, and their interactions, marital status, education and labour force status, and plotted for reference categories for all covariates.

Figure S8. Sex differences in probability of  $\geq 1$  ADL limitation by region.

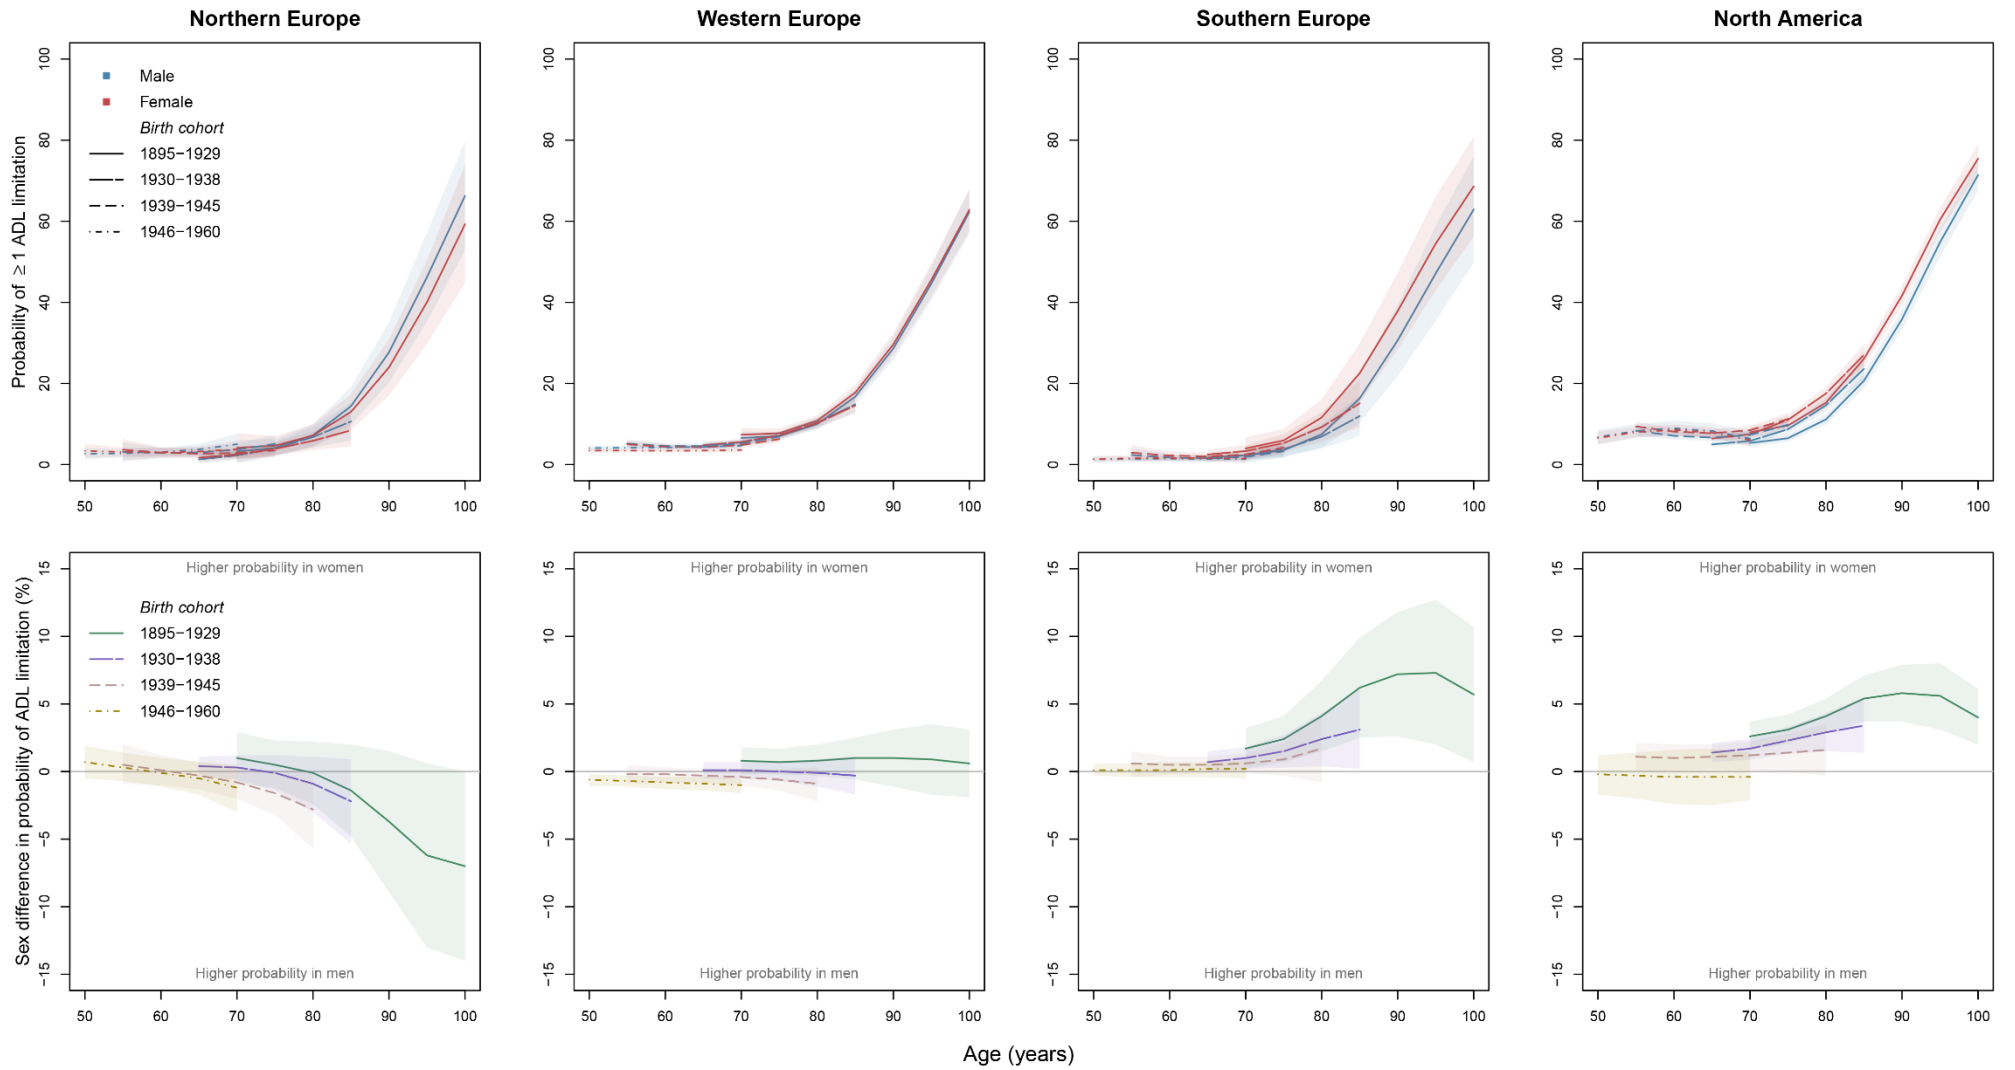

Top panel shows the probability of having  $\geq 1$  ADL limitation plotted by age for men and women in each birth cohort. Bottom panel shows the sex difference in probability of  $\geq 1$  ADL limitation: positive value indicates women have greater probability than men of  $\geq 1$  ADL limitation. Predicted probabilities based on models in each region adjusted for sex, age, birth cohort, and their interactions, marital status, education and labour force status, and plotted for reference categories for all covariates.

**Table S1. Countries in each included study.**

| <b><i>Study</i></b> | <b><i>Region</i></b> | <b><i>Country</i></b> |
|---------------------|----------------------|-----------------------|
| <i>ELSA</i>         | Western Europe       | England               |
| <i>TILDA</i>        | Western Europe       | Ireland               |
| <i>SHARE</i>        | Northern Europe      | Denmark               |
|                     |                      | Sweden                |
|                     | Western Europe       | Austria               |
|                     |                      | Belgium               |
|                     |                      | France                |
|                     |                      | Germany               |
|                     |                      | Netherlands           |
|                     |                      | Switzerland           |
|                     | Southern Europe      | Greece                |
|                     |                      | Italy                 |
| Spain               |                      |                       |
| <i>HRS</i>          | North America        | United States         |

Abbreviations: ELSA: English Longitudinal Study of Ageing; TILDA: The Irish Longitudinal Study on Ageing; SHARE: Survey of Health, Ageing and Retirement in Europe; HRS: Health and Retirement Study

**Table S2. Waves and years included in analyses from ELSA, TILDA, SHARE, and HRS.**

| <i>Year</i> | <i>ELSA</i> | <i>TILDA</i> | <i>SHARE</i> | <i>HRS</i> |
|-------------|-------------|--------------|--------------|------------|
| 2000        |             |              |              | Wave 5     |
| 2001        |             |              |              |            |
| 2002        | Wave 1      |              |              | Wave 6     |
| 2003        |             |              |              |            |
| 2004        | Wave 2      |              | Wave 1       | Wave 7     |
| 2005        |             |              |              |            |
| 2006        | Wave 3      |              | Wave 2       | Wave 8     |
| 2007        |             |              |              |            |
| 2008        | Wave 4      |              |              | Wave 9     |
| 2009        |             |              |              |            |
| 2010        | Wave 5      | Wave 1       |              | Wave 10    |
| 2011        |             |              | Wave 4       |            |
| 2012        | Wave 6      |              |              | Wave 11    |
| 2013        |             |              | Wave 5       |            |
| 2014        | Wave 7      | Wave 3       |              | Wave 12    |
| 2015        |             |              | Wave 6       |            |
| 2016        | Wave 8      | Wave 4       |              | Wave 13    |
| 2017        |             |              | Wave 7       |            |
| 2018        | Wave 9      |              |              |            |
| 2019        |             |              |              |            |

Abbreviations: ELSA: English Longitudinal Study of Ageing; TILDA: The Irish Longitudinal Study on Ageing; SHARE: Survey of Health, Ageing and Retirement in Europe; HRS: Health and Retirement Study

Wave 2 of TILDA and wave 3 of SHARE were included as no data on functional limitations was assessed at these waves. The baseline wave for HRS was wave 5 to allow for similar years of follow-up between studies.

**Table S3. Activities assessed for each functional measure.**

| <i>Mobility activities</i>           | <i>IADL</i>         | <i>ADL</i>              |
|--------------------------------------|---------------------|-------------------------|
| Getting up from a chair              | Managing money      | Walking across the room |
| Climbing 1 flight of stairs          | Taking medications  | Dressing                |
| Stooping, kneeling, or crouching     | Grocery shopping    | Bathing                 |
| Reaching/extending the arms          | Preparing meals     | Eating                  |
| Lifting/carrying weights over 10 lbs | Using the telephone | Getting in/out of bed   |
| Walking 1 block/100 yds/100 m        | House/garden work*  | Using the toilet        |

\*For house/garden work, HRS participants were asked whether their health limited their ability to perform housework (yes/no).



**Table S4. Baseline distribution of self-reported chronic conditions in the pooled study population.**

|                                       | <b>Men</b>       | <b>Women</b>     | <b>P-value</b>    |
|---------------------------------------|------------------|------------------|-------------------|
|                                       | <b>N = 27923</b> | <b>N = 34452</b> |                   |
| <b>High blood pressure, N (%)</b>     |                  |                  |                   |
| No                                    | 17795 (63.7)     | 21054 (61.1)     |                   |
| Yes                                   | 10128 (36.3)     | 13398 (38.9)     | <i>&lt;0.0001</i> |
| <b>Diabetes, N (%)</b>                |                  |                  |                   |
| No                                    | 24674 (88.4)     | 31140 (90.4)     |                   |
| Yes                                   | 3249 (11.6)      | 3312 (9.6)       | <i>&lt;0.0001</i> |
| <b>Cancer, N (%)</b>                  |                  |                  |                   |
| No                                    | 26042 (93.3)     | 31720 (92.1)     |                   |
| Yes                                   | 1881 (6.7)       | 2732 (7.9)       | <i>&lt;0.0001</i> |
| <b>Lung disease, N (%)</b>            |                  |                  |                   |
| No                                    | 26162 (93.7)     | 32564 (94.5)     |                   |
| Yes                                   | 1761 (6.3)       | 1888 (5.5)       | <i>&lt;0.0001</i> |
| <b>Psychiatric illness, N (%)</b>     |                  |                  |                   |
| No                                    | 26350 (94.4)     | 30874 (89.6)     |                   |
| Yes                                   | 1573 (5.6)       | 3578 (10.4)      | <i>&lt;0.0001</i> |
| <b>Arthritis, N (%)</b>               |                  |                  |                   |
| No                                    | 20859 (74.7)     | 21504 (62.4)     |                   |
| Yes                                   | 7064 (25.3)      | 12948 (37.6)     | <i>&lt;0.0001</i> |
| <b>Cardiovascular disease,* N (%)</b> |                  |                  |                   |
| No                                    | 21640 (77.5)     | 28799 (83.6)     |                   |
| Yes                                   | 6283 (22.5)      | 5653 (16.4)      | <i>&lt;0.0001</i> |

\*Heart attack and stroke.

**Table S5. Sex differences in probability of mobility limitations by severity of limitations.**

|                                         | Percent sex difference (95% CI) in probability of number of mobility limitations |                |                   |
|-----------------------------------------|----------------------------------------------------------------------------------|----------------|-------------------|
|                                         | At age 65                                                                        | At age 75      | At age 85         |
| <b>1 limitation</b>                     |                                                                                  |                |                   |
| 1895-1929                               | No data                                                                          | 3.8 (3.3, 4.2) | -0.6 (-1.0, -0.3) |
| 1930-1938                               | 3.8 (3.4, 4.2)                                                                   | 3.2 (2.9, 3.5) | -1.0 (-1.3, -0.7) |
| 1939-1945                               | 3.9 (3.5, 4.3)                                                                   | 3.4 (3.0, 3.8) | No data           |
| 1946-1960                               | 3.0 (2.6, 3.4)                                                                   | No data        | No data           |
| <i>P sex difference by birth cohort</i> | <i>0.0016</i>                                                                    | <i>0.083</i>   | <i>0.023</i>      |
| <b>2 limitations</b>                    |                                                                                  |                |                   |
| 1895-1929                               | No data                                                                          | 3.9 (3.5, 4.4) | 1.8 (1.6, 2.0)    |
| 1930-1938                               | 3.7 (3.4, 4.1)                                                                   | 3.6 (3.3, 3.9) | 1.7 (1.5, 1.9)    |
| 1939-1945                               | 4.0 (3.6, 4.3)                                                                   | 3.7 (3.3, 4.1) | No data           |
| 1946-1960                               | 3.1 (2.7, 3.4)                                                                   | No data        | No data           |
| <i>P sex difference by birth cohort</i> | <i>0.0018</i>                                                                    | <i>0.46</i>    | <i>0.51</i>       |
| <b>≥3 limitations</b>                   |                                                                                  |                |                   |
| 1895-1929                               | No data                                                                          | 6.6 (5.8, 7.4) | 10.7 (9.4, 12.0)  |
| 1930-1938                               | 3.8 (3.3, 4.2)                                                                   | 6.9 (6.2, 7.5) | 10.3 (8.9, 11.8)  |
| 1939-1945                               | 4.3 (3.9, 4.8)                                                                   | 6.8 (6.0, 7.6) | No data           |
| 1946-1960                               | 3.2 (2.8, 3.7)                                                                   | No data        | No data           |
| <i>P sex difference by birth cohort</i> | <i>0.00080</i>                                                                   | <i>0.85</i>    | <i>0.67</i>       |

Estimates extracted at age 65, 75, and 85 with age analysed as a continuous term; analyses further adjusted for sex, birth cohort, and their interactions, marital status, study, region, education, and labour force status. Positive value indicates women have greater probability than men of having given number of limitations.

**Table S6. Sex differences in probability of instrumental activity of daily living (IADL) limitations by severity of limitations.**

|                                         | Percent sex difference (95% CI) in probability of number of IADL limitations |                |                |
|-----------------------------------------|------------------------------------------------------------------------------|----------------|----------------|
|                                         | At age 65                                                                    | At age 75      | At age 85      |
| <b>1 limitation</b>                     |                                                                              |                |                |
| 1895-1929                               | No data                                                                      | 1.1 (0.7, 1.4) | 1.6 (1.1, 2.0) |
| 1930-1938                               | 0.5 (0.4, 0.7)                                                               | 1.1 (0.8, 1.4) | 1.1 (0.7, 1.6) |
| 1939-1945                               | 0.7 (0.4, 0.9)                                                               | 1.1 (0.7, 1.6) | No data        |
| 1946-1960                               | 0.6 (0.3, 0.8)                                                               | No data        | No data        |
| <i>P sex difference by birth cohort</i> | <i>0.63</i>                                                                  | <i>0.97</i>    | <i>0.098</i>   |
| <b>2 limitations</b>                    |                                                                              |                |                |
| 1895-1929                               | No data                                                                      | 0.3 (0.2, 0.4) | 0.8 (0.6, 1.1) |
| 1930-1938                               | 0.2 (0.1, 0.2)                                                               | 0.3 (0.2, 0.4) | 0.8 (0.5, 1.2) |
| 1939-1945                               | 0.2 (0.1, 0.3)                                                               | 0.3 (0.2, 0.5) | No data        |
| 1946-1960                               | 0.2 (0.1, 0.2)                                                               | No data        | No data        |
| <i>P sex difference by birth cohort</i> | <i>0.57</i>                                                                  | <i>0.97</i>    | <i>0.99</i>    |
| <b>≥3 limitations</b>                   |                                                                              |                |                |
| 1895-1929                               | No data                                                                      | 0.3 (0.2, 0.4) | 1.9 (1.4, 2.5) |
| 1930-1938                               | 0.1 (0.1, 0.2)                                                               | 0.3 (0.2, 0.4) | 1.8 (1.2, 2.5) |
| 1939-1945                               | 0.2 (0.1, 0.2)                                                               | 0.3 (0.2, 0.5) | No data        |
| 1946-1960                               | 0.1 (0.1, 0.2)                                                               | No data        | No data        |
| <i>P sex difference by birth cohort</i> | <i>0.39</i>                                                                  | <i>0.78</i>    | <i>0.74</i>    |

Estimates extracted at age 65, 75, and 85 with age analysed as a continuous term; analyses further adjusted for sex, birth cohort, and their interactions, marital status, study, region, education, and labour force status. Positive value indicates women have greater probability than men of having given number of limitations.

**Table S7. Sex differences in probability of activity of daily living (ADL) limitations by severity of limitations.**

|                                         | Percent sex difference (95% CI) in probability of number of ADL limitations |                 |                |
|-----------------------------------------|-----------------------------------------------------------------------------|-----------------|----------------|
|                                         | At age 65                                                                   | At age 75       | At age 85      |
| <b>1 limitation</b>                     |                                                                             |                 |                |
| 1895-1929                               | No data                                                                     | 0.8 (0.5, 1.0)  | 0.9 (0.6, 1.3) |
| 1930-1938                               | 0.3 (0.2, 0.5)                                                              | 0.5 (0.2, 0.7)  | 0.4 (0.1, 0.8) |
| 1939-1945                               | 0.1 (-0.1, 0.3)                                                             | 0.1 (-0.2, 0.4) | No data        |
| 1946-1960                               | -0.3 (-0.5, -0.1)                                                           | No data         | No data        |
| <i>P sex difference by birth cohort</i> | <i>0.00020</i>                                                              | <i>0.010</i>    | <i>0.035</i>   |
| <b>2 limitations</b>                    |                                                                             |                 |                |
| 1895-1929                               | No data                                                                     | 0.3 (0.2, 0.4)  | 0.5 (0.3, 0.7) |
| 1930-1938                               | 0.1 (0.1, 0.2)                                                              | 0.2 (0.1, 0.3)  | 0.2 (0.0, 0.4) |
| 1939-1945                               | 0.0 (-0.0, 0.1)                                                             | 0.0 (-0.1, 0.1) | No data        |
| 1946-1960                               | -0.1 (-0.2, -0.0)                                                           | No data         | No data        |
| <i>P sex difference by birth cohort</i> | <i>0.00020</i>                                                              | <i>0.0076</i>   | <i>0.037</i>   |
| <b>≥3 limitations</b>                   |                                                                             |                 |                |
| 1895-1929                               | No data                                                                     | 0.3 (0.2, 0.4)  | 1.0 (0.6, 1.3) |
| 1930-1938                               | 0.1 (0.1, 0.2)                                                              | 0.2 (0.1, 0.3)  | 0.4 (0.1, 0.8) |
| 1939-1945                               | 0.0 (-0.0, 0.1)                                                             | 0.0 (-0.1, 0.2) | No data        |
| 1946-1960                               | -0.1 (-0.2, -0.0)                                                           | No data         | No data        |
| <i>P sex difference by birth cohort</i> | <i>0.00020</i>                                                              | <i>0.012</i>    | <i>0.028</i>   |

Estimates extracted at age 65, 75, and 85 with age analysed as a continuous term; analyses further adjusted for sex, birth cohort, and their interactions, marital status, study, region, education, and labour force status. Positive value indicates women have greater probability than men of having given number of limitations.
